# Supplementary material for: All-carbon lithium capacitor based on salt crystal-templated, N-doped porous carbon electrodes with superior energy storage
Source: Royal Society of Chemistry journal article supplement (doi:10.1039/c8ta06184j), 2018-01-01
Supplement: c8ta06184j1.pdf [file c8ta06184j1.pdf]

## Supporting Information

### **All Carbon Lithium Capacitor Based on Salt Crystals Designed N-doping Porous Carbon Electrodes with Superior Energy Storage**

*Yongpeng Cui, Wei Liu\*, Yan Lyu, Yuan Zhang, Huanlei Wang\*, Yujing Liu, Dong Li*

*School of Materials Science and Engineering, Ocean University of China, Qingdao 266100, China.*

\*Email: [weiliu@ouc.edu.cn](mailto:weiliu@ouc.edu.cn); [huanleiwang@ouc.edu.cn](mailto:huanleiwang@ouc.edu.cn)

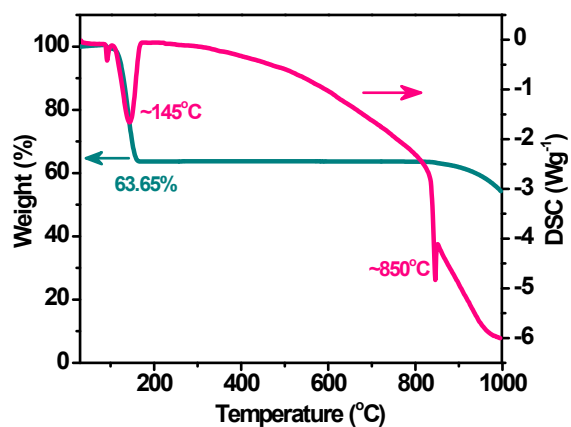

**Figure S1.** The TGA and DSC curves of  $\text{NaHCO}_3$  under nitrogen atmosphere. There is a weight loss of 36.35% at about 145 °C, which can be ascribed to the decomposition of  $\text{NaHCO}_3$  ( $2\text{NaHCO}_3 \rightarrow \text{Na}_2\text{CO}_3 + \text{H}_2\text{O} + \text{CO}_2$ ). When the temperature is increased to about 850 °C, another weight loss is observed, indicating the  $\text{Na}_2\text{CO}_3$  begins to decompose.

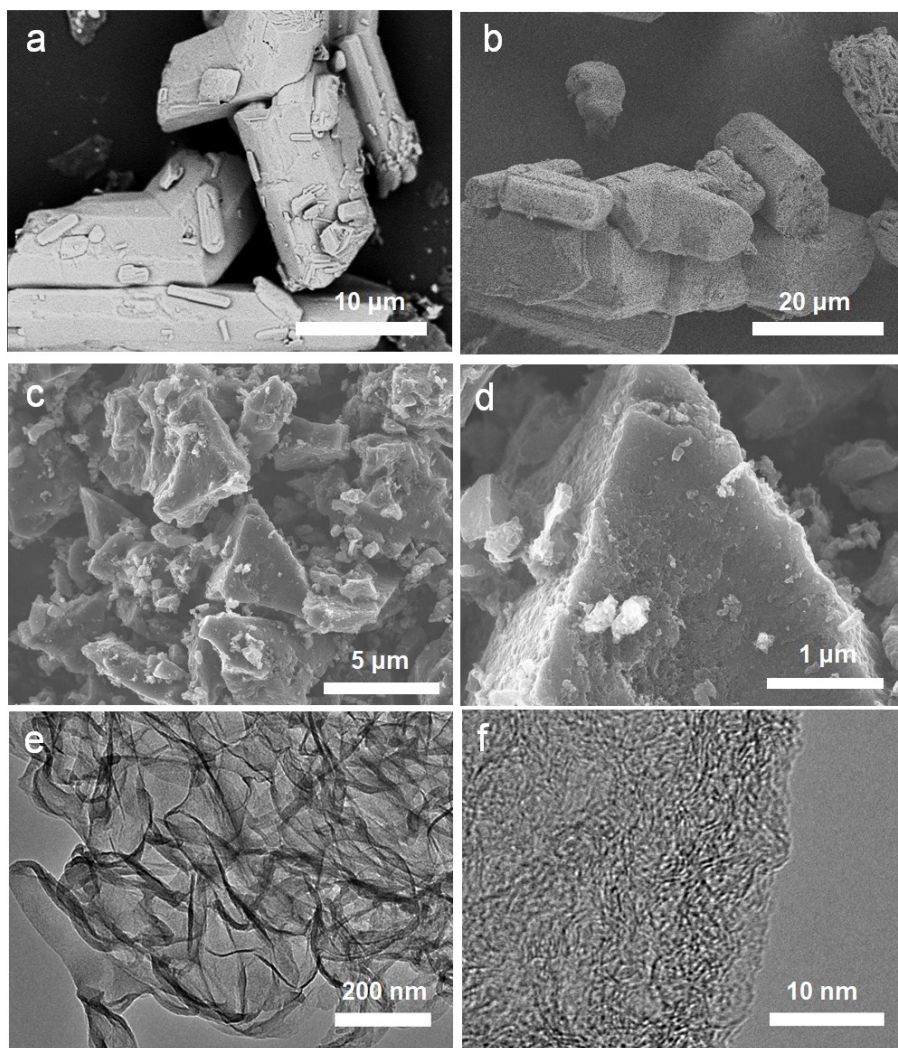

**Figure S2.** (a) SEM micrograph of  $\text{NaHCO}_3$  crystals, (b) SEM micrograph of  $\text{Na}_2\text{CO}_3$  framework derived from the decomposition of  $\text{NaHCO}_3$  crystals at 200 °C. (c, d) SEM micrographs of the morphology for the NC without  $\text{NaHCO}_3$  and KOH, and (e, f) TEM micrographs of the PC without adding urea. When the methyl cellulose was carbonized without activating agent, the NC displays dense and particulate-like morphology, confirming that KOH/ $\text{NaHCO}_3$  plays a vital role in the formation of 3D interconnected porous structure.

**Table S1.** Physical and electrochemical properties of NC, PC and NPC samples.

| Sample | $S_{BET}^a$<br>( $m^2 g^{-1}$ ) | $V_t^b$<br>( $cm^3 g^{-1}$ ) | Pore vol (%) |              |             |
|--------|---------------------------------|------------------------------|--------------|--------------|-------------|
|        |                                 |                              | $V_{<1 nm}$  | $V_{1-2 nm}$ | $V_{>2 nm}$ |
| NC     | 616                             | 0.43                         | -            | -            | -           |
| PC     | 1771                            | 1.98                         | 7.5          | 16.5         | 76.5        |
| NPC    | 1748                            | 1.47                         | 9.0          | 22.0         | 68.5        |

<sup>a</sup> Specific surface area was calculated by the Brunauer-Emmett-Teller (BET) method.

<sup>b</sup> Total pore volume was determined by the density functional theory (DFT) method.

**Table S2.** Relative surface concentrations of nitrogen and oxygen species obtained by fitting N1s and O1s core level XPS spectra.

| Sample | O1s (%) |       |       | N1s (%) |       |       |
|--------|---------|-------|-------|---------|-------|-------|
|        | O-I     | O-II  | O-III | N-6     | N-5   | N-Q   |
| PC     | 40.82   | 47.21 | 11.97 | -       | -     | -     |
| NC     | 35.89   | 51.77 | 12.34 | 29.67   | 38.08 | 32.25 |
| NPC    | 40.68   | 45.25 | 14.07 | 40.39   | 27.23 | 32.37 |

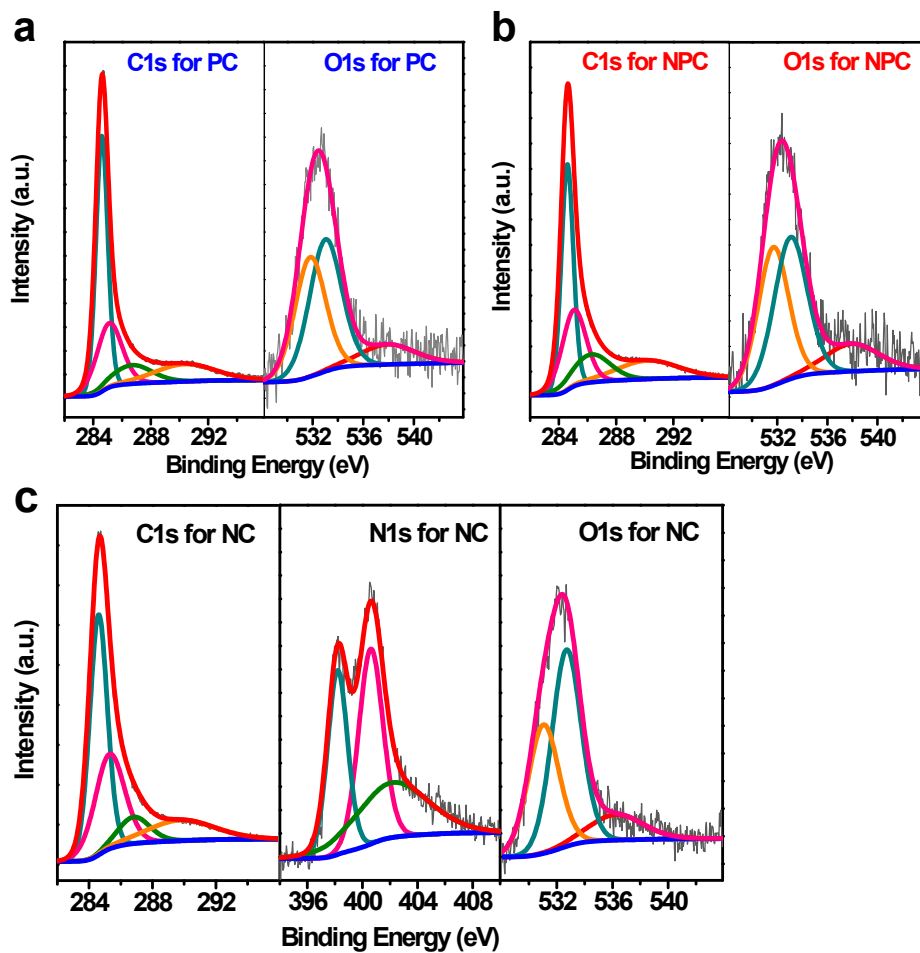

Figure S3. The high-resolution XPS C1s, N1s, and O1s spectra of (a) PC, (b) NPC, and (c) NC.

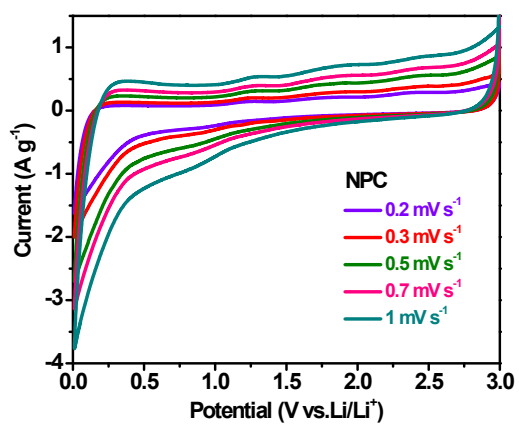

**Figure S4.** CV curves of the NPC electrodes at different scan rates for lithium-ion battery anodes.

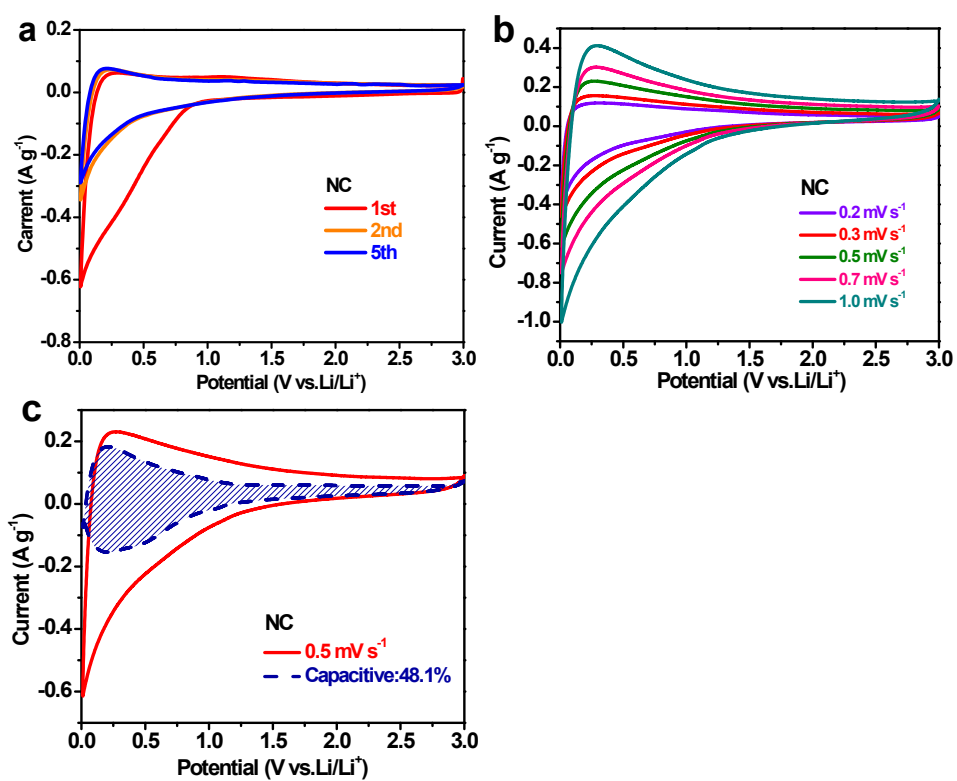

**Figure S5.** Electrochemical properties of NC tested for lithium-ion battery anodes. (a) CV curves for the first, second, and fifth cycles at the scan rate of 0.1 mV s<sup>-1</sup>. (b) CV curve at different scan rates, and (c) CV curve at 0.5 mV s<sup>-1</sup> with shadowed area representing the surface capacitive contribution.



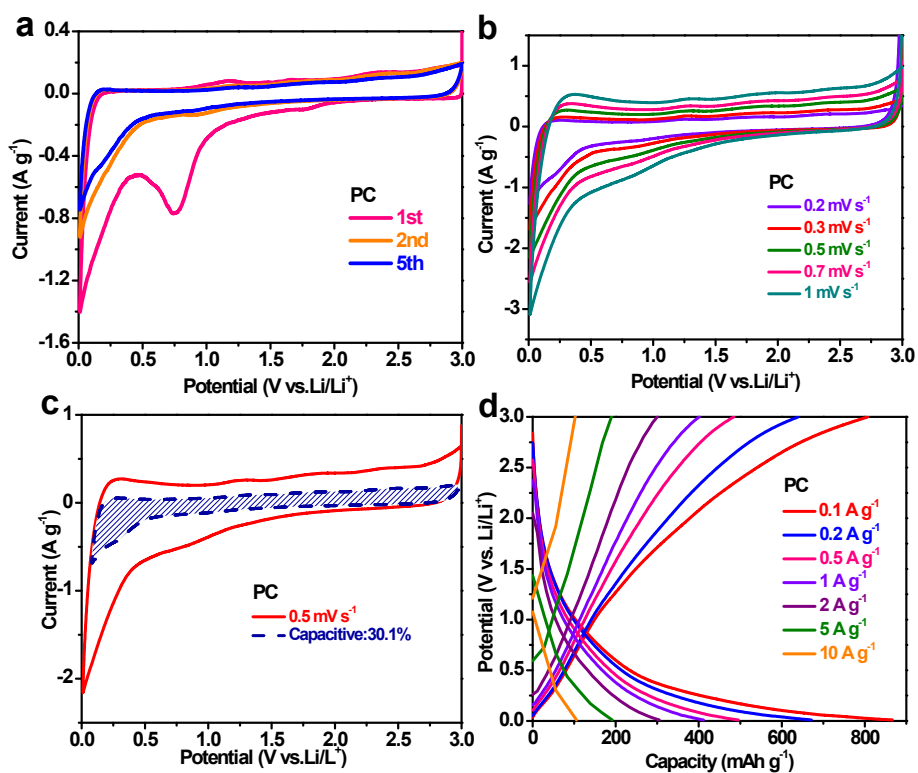

**Figure S6.** Electrochemical properties of PC tested for lithium-ion battery anodes. (a) CV curves for the first, second, and fifth cycles at the scan rate of  $0.1 \text{ mV s}^{-1}$ . (b) CV curve at different scan rates, and (c) CV curve at  $0.5 \text{ mV s}^{-1}$  with shadowed area representing the surface capacitive contribution. (d) Charge-discharge curves at different current densities.

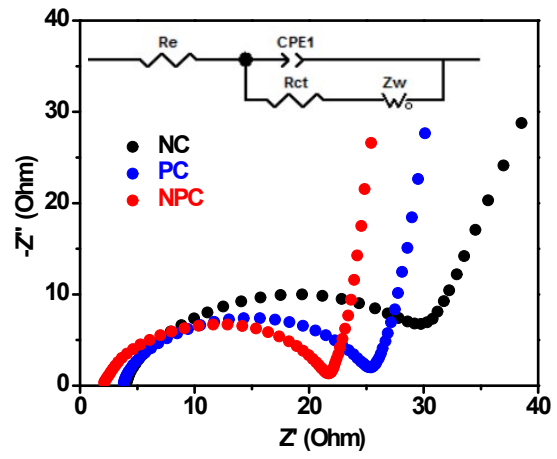

Figure S7. Nyquist plots and equivalent circuit model of all electrodes.

**Table S3.** Comparison of capacity and cycling stability for N-doped carbon-based LIB-anode with previous reports.

| Sample                                                     | Voltage window | Capacity                                                | Cyclability                                                    | Heteroatom content |
|------------------------------------------------------------|----------------|---------------------------------------------------------|----------------------------------------------------------------|--------------------|
| NPC<br>(this work)                                         | 0.01-3 V       | 1500-1800 mAh g <sup>-1</sup> at 0.1A g <sup>-1</sup> ; | 1475 mAh g <sup>-1</sup> , 230 cycles (0.1 A g <sup>-1</sup> ) | N (1.97 at%)       |
|                                                            |                | ~1200 mAh g <sup>-1</sup> at 0.2 A g <sup>-1</sup> ;    | 385 mAh g <sup>-1</sup> , 2000 cycles (5 A g <sup>-1</sup> )   | O (3.37 at%)       |
|                                                            |                | ~940 mA h g <sup>-1</sup> at 0.5 A g <sup>-1</sup> ;    | 301 mAh g <sup>-1</sup> , 5000 cycles (10 A g <sup>-1</sup> )  |                    |
|                                                            |                | ~650 mA h g <sup>-1</sup> at 2 A g <sup>-1</sup> ;      |                                                                |                    |
|                                                            |                | ~369 mAh g <sup>-1</sup> at 10 A g <sup>-1</sup> ;      |                                                                |                    |
| Hierarchical porous N-rich carbon nanospheres <sup>1</sup> | 0.01-3 V       | 1158 mAh g <sup>-1</sup> at 0.1 A g <sup>-1</sup> ;     | 788 mAh g <sup>-1</sup> , 500 cycles (1 A g <sup>-1</sup> )    | N (17.4 wt%)       |
|                                                            |                | 907 mA h g <sup>-1</sup> at 0.5 A g <sup>-1</sup> ;     | 396 mAh g <sup>-1</sup> , 1000 cycles (5 A g <sup>-1</sup> )   |                    |
|                                                            |                | 796 mAh g <sup>-1</sup> at 1 A g <sup>-1</sup> ;        |                                                                |                    |
|                                                            |                | 470 mAh g <sup>-1</sup> at 5 A g <sup>-1</sup> ;        |                                                                |                    |
| N-doped hollow carbon nanospheres <sup>2</sup>             | 0.01-3 V       | 1945 mAh g <sup>-1</sup> at 0.1 A g <sup>-1</sup> ;     | 879 mAh g <sup>-1</sup> , 1000 cycles (5 A g <sup>-1</sup> )   | N (16.6 at%)       |
|                                                            |                | 1167 mAh g <sup>-1</sup> at 3.2 A g <sup>-1</sup> ;     |                                                                |                    |
| N-rich carbon spheres <sup>3</sup>                         | 0.01-3 V       | 1038 mAh g <sup>-1</sup> at 0.1 A g <sup>-1</sup> ;     | 1391 mAh g <sup>-1</sup> , 100 cycles (0.1 A g <sup>-1</sup> ) | N (14.51 %)        |
|                                                            |                | 752 mA h g <sup>-1</sup> at 0.5 A g <sup>-1</sup> ;     | 638 mAh g <sup>-1</sup> , 2000 cycles (2 A g <sup>-1</sup> )   |                    |
|                                                            |                | 454 mAh g <sup>-1</sup> at 2 A g <sup>-1</sup> ;        |                                                                |                    |
|                                                            |                | 272 mAh g <sup>-1</sup> at 6 A g <sup>-1</sup> ;        |                                                                |                    |
| Pyrrolic N-enriched carbon fibers <sup>4</sup>             | 0.005-3 V      | 842.9 mAh g <sup>-1</sup> at 0.1 A g <sup>-1</sup> ;    | 789.7 mAh g <sup>-1</sup> , 500 cycles (1 A g <sup>-1</sup> )  | N (3.87 at%)       |
|                                                            |                | 447.6 mA h g <sup>-1</sup> at 1 A g <sup>-1</sup> ;     | 370.9 mAh g <sup>-1</sup> , 1000 cycles (5 A g <sup>-1</sup> ) |                    |
|                                                            |                | 282.0 mAh g <sup>-1</sup> at 5 A g <sup>-1</sup> ;      |                                                                |                    |
|                                                            |                | 184.1 mAh g <sup>-1</sup> at 15 A g <sup>-1</sup> ;     |                                                                |                    |
| N-enriching carbon networks <sup>5</sup>                   | 0.01-3 V       | 1300 mAh g <sup>-1</sup> at 0.2 A g <sup>-1</sup> ;     | ~600 mAh g <sup>-1</sup> , 1000 cycles (5 A g <sup>-1</sup> )  | N (9.7 at%)        |
|                                                            |                | 770 mA h g <sup>-1</sup> at 1 A g <sup>-1</sup> ;       |                                                                |                    |
|                                                            |                | 360 mAh g <sup>-1</sup> at 5 A g <sup>-1</sup> ;        |                                                                |                    |
|                                                            |                | 280 mAh g <sup>-1</sup> at 10 A g <sup>-1</sup> ;       |                                                                |                    |
| N-doped                                                    | 0.01-3 V       | 2163 mAh g <sup>-1</sup> at 0.1 A g <sup>-1</sup> ;     | 785 mAh g <sup>-1</sup> , 1000 cycles (5 A g <sup>-1</sup> )   | N (25.99)          |

|                             |          |                                                         |                                                              |              |
|-----------------------------|----------|---------------------------------------------------------|--------------------------------------------------------------|--------------|
| graphene                    |          | 1790 mA h g <sup>-1</sup> at 0.2 A g <sup>-1</sup> ;    |                                                              | wt%)         |
| analogous                   |          | 1361 mAh g <sup>-1</sup> at 0.8 A g <sup>-1</sup> ;     |                                                              |              |
| particles <sup>6</sup>      |          | 1182 mAh g <sup>-1</sup> at 1.6 A g <sup>-1</sup> ;     |                                                              |              |
| N-doped porous              | 0.01-3 V | 1455 mAh g <sup>-1</sup> at 0.1 A g <sup>-1</sup> ;     | ~300 mAh g <sup>-1</sup> , 500 cycles (2 A g <sup>-1</sup> ) | N (7.2 wt%)  |
| carbons derived             |          | 604-658 mA h g <sup>-1</sup> at 0.5 A g <sup>-1</sup> ; |                                                              | O (7.4 wt%)  |
| from natural                |          | 223-233 mAh g <sup>-1</sup> at 5 A g <sup>-1</sup> ;    |                                                              |              |
| polysaccharide <sup>7</sup> |          | 162-173 mAh g <sup>-1</sup> at 10 A g <sup>-1</sup> ;   |                                                              |              |
| N, O-codoped                | 0.01-3 V | 900-1000 mAh g <sup>-1</sup> at 0.1 A g <sup>-1</sup> ; | ~350 mAh g <sup>-1</sup> , 500 cycles (2 A g <sup>-1</sup> ) | N (0.64-0.85 |
| hierarchical                |          | 650 mA h g <sup>-1</sup> at 0.5 A g <sup>-1</sup> ;     |                                                              | at%)         |
| porous carbons <sup>8</sup> |          | 220 mAh g <sup>-1</sup> at 5 A g <sup>-1</sup> ;        |                                                              | O (11.4-12.2 |
|                             |          | 170 mAh g <sup>-1</sup> at 10 A g <sup>-1</sup> ;       |                                                              | at%)         |

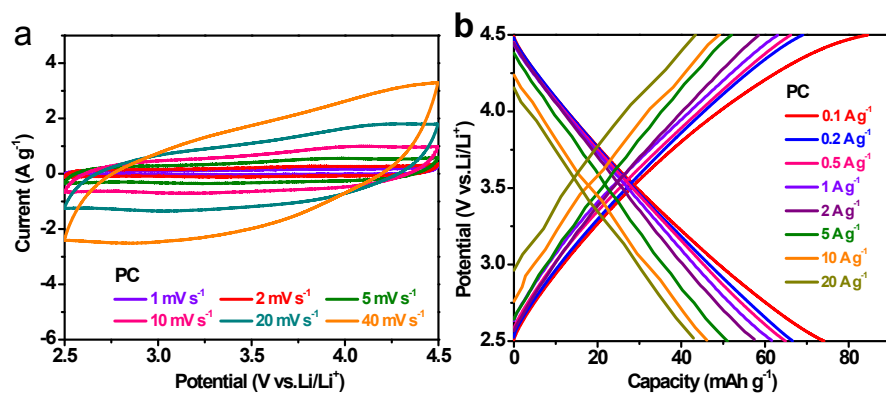

**Figure S8.** (a) CV curves at different scan rates, and (b) charge-discharge curves at different current densities for PC electrode for lithium-ion battery cathode.

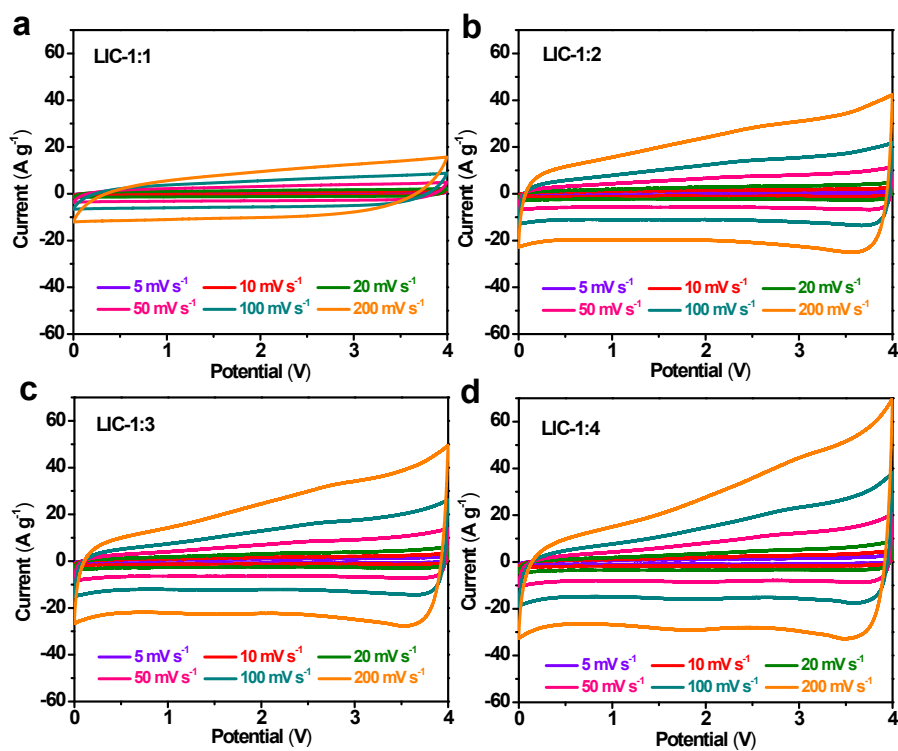

**Figure S9.** Typical CV curves of the NPC//NPC ACS-LIC at different scan rates for the voltage window of 0-4.0 V.

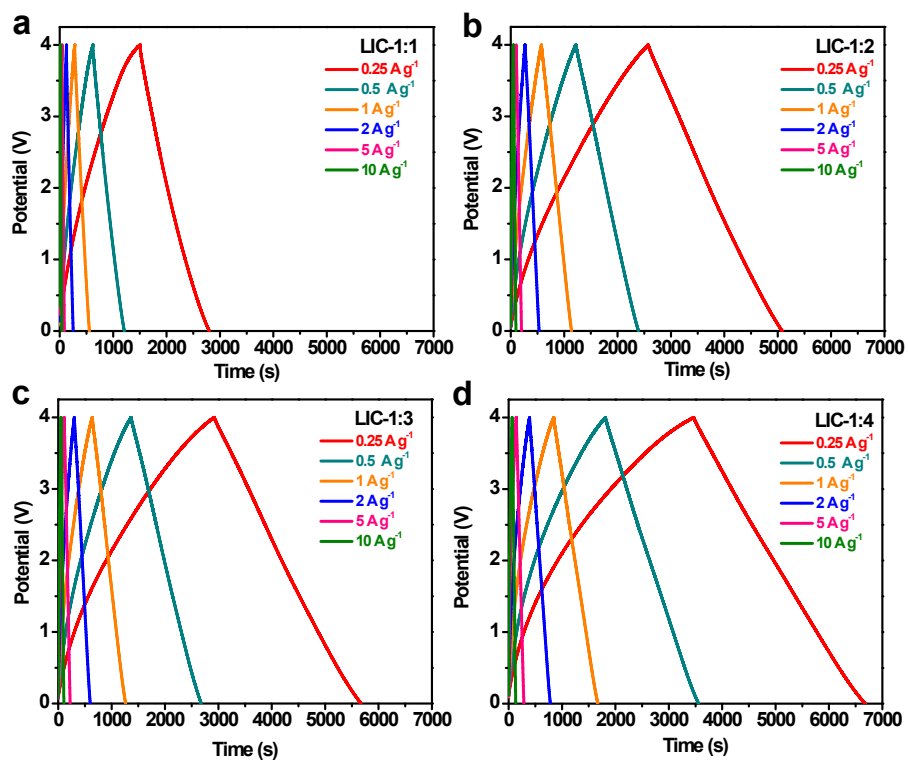

**Figure S10.** Typical charge-discharge curves of the NPC//NPC ACS-LIC at different current densities of the 0.25-10 A g<sup>-1</sup> for the voltage window of 0-4.0 V.

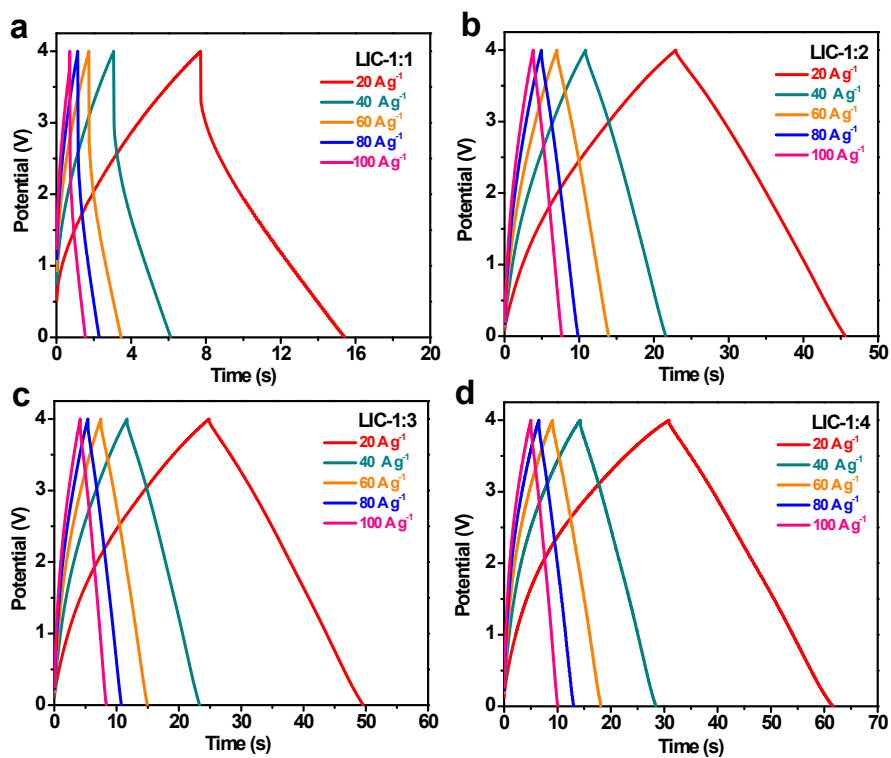

**Figure S11.** Typical charge-discharge curves of the NPC//NPC ACS-LIC at high current densities of the 20-100 A g<sup>-1</sup> for the voltage window of 0-4.0 V.



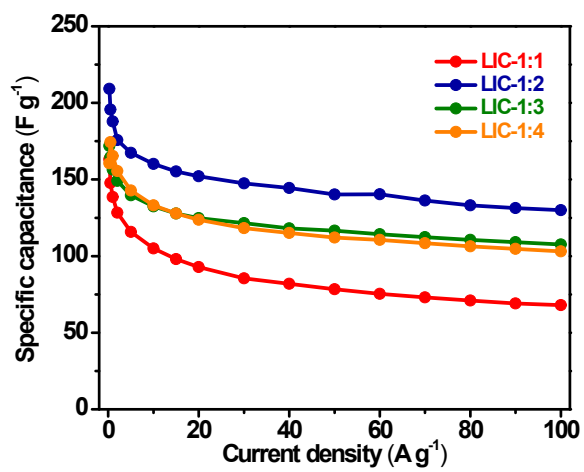

**Figure S12.** Specific capacitances of the NPC//NPC ACS-LIC at different current densities based on total mass of the both cathode and anode.

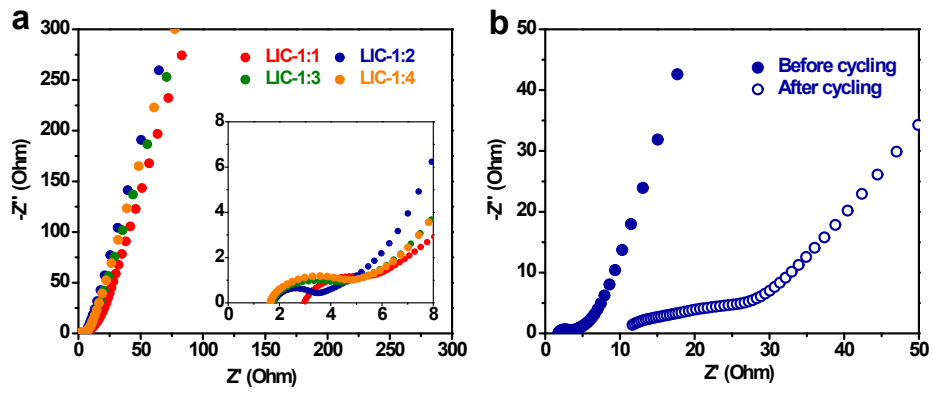

**Figure S13.** (a) Nyquist plots of the NPC//NPC ACS-LIC, and (b) Nyquist plot for NPC//NPC LIC-1:2 before/after cycling.

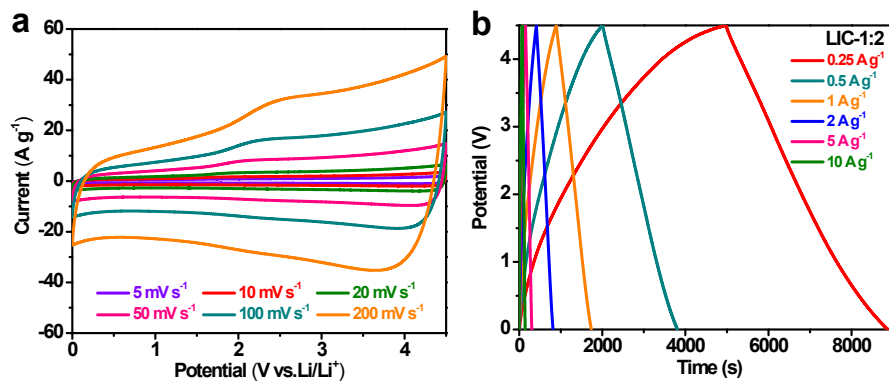

**Figure S14.** The electrochemical property of the NPC//NPC LIC with anode to cathode mass ratios of 1:2 in the voltage window of 0-4.5 V. (a) CV curves at different scan rates. (b) Charge-discharge curves at different current densities of the 0.25-10  $A g^{-1}$ .

**Table S4.** Comparison of capacitance and energy density of carbon-based electrodes for supercapacitors in ionic liquid electrolyte.

| Sample                                              | Voltage window | Maximum energy                                           | Energy at high power                                     | Cyclability                                                                                                   |
|-----------------------------------------------------|----------------|----------------------------------------------------------|----------------------------------------------------------|---------------------------------------------------------------------------------------------------------------|
| NPC//NPC<br>(this work)                             | 0-4.0 V        | 116 Wh kg <sup>-1</sup> at<br>167 W kg <sup>-1</sup>     | 70 Wh kg <sup>-1</sup> at 66<br>kW kg <sup>-1</sup>      | 80%, 20000 cycles (10 A g <sup>-1</sup> )<br>104.8%, 10000 cycles (2 A g <sup>-1</sup> )                      |
|                                                     | 0-4.5 V        | 203 Wh kg <sup>-1</sup> at<br>187 W kg <sup>-1</sup>     | 103 Wh kg <sup>-1</sup> at<br>42 kW kg <sup>-1</sup>     | 84.6%, 5000 cycles (10 A g <sup>-1</sup> )                                                                    |
| BNC//BNC <sup>9</sup>                               | 0.02-4.0 V     | 133 Wh kg <sup>-1</sup> at<br>200 W kg <sup>-1</sup>     | 72 Wh kg <sup>-1</sup> at<br>22.5 kW kg <sup>-1</sup>    | ~104%, 5000 cycles (2 A g <sup>-1</sup> )                                                                     |
|                                                     | 0.02-4.5 V     | 220 Wh kg <sup>-1</sup> at<br>225 W kg <sup>-1</sup>     | 104 Wh kg <sup>-1</sup> at<br>20 kW kg <sup>-1</sup>     | 81%, 5000 cycles (2 A g <sup>-1</sup> )                                                                       |
| PHPNC//TiC <sup>10</sup>                            | 0-4.5 V        | 101.5 Wh kg <sup>-1</sup> at<br>450 W kg <sup>-1</sup>   | 23.4 Wh kg <sup>-1</sup> at<br>67.5 kW kg <sup>-1</sup>  | 92%, 5000 cycles at 0-4 V<br>voltage window (2 A g <sup>-1</sup> )<br>82%, 5000 cycles (2 A g <sup>-1</sup> ) |
| MnO-C//CNS <sup>11</sup>                            | 1.0-4.0 V      | 100 Wh kg <sup>-1</sup> at 83<br>W kg <sup>-1</sup>      | 30 Wh kg <sup>-1</sup> at 20<br>kW kg <sup>-1</sup>      | 70%, 5000 cycles (5 A g <sup>-1</sup> )                                                                       |
| C//SnO <sub>2</sub> -C <sup>12</sup>                | 0.005-4.5<br>V | 110 Wh kg <sup>-1</sup> at 1 A<br>g <sup>-1</sup>        | -                                                        | 80%, 2000 cycles (1 A g <sup>-1</sup> )                                                                       |
| Fe <sub>3</sub> O <sub>4</sub> /G//PG <sup>13</sup> | 1.0-4.0 V      | 204 Wh kg <sup>-1</sup> at 55<br>W kg <sup>-1</sup>      | 122 Wh kg <sup>-1</sup> at<br>1000 W kg <sup>-1</sup>    | 70%, 1000 cycles (2 A g <sup>-1</sup> )                                                                       |
| GDY//AC <sup>14</sup>                               | 2.0-4.0 V      | 110.7 Wh kg <sup>-1</sup> at<br>100.3 W kg <sup>-1</sup> | 95.1 Wh kg <sup>-1</sup> at<br>1000.4 W kg <sup>-1</sup> | 94.7%, 1000 cycles (0.2 A g <sup>-1</sup> )                                                                   |
| CPIMS//AC <sup>15</sup>                             | 2.0-4.0 V      | 29.5 Wh kg <sup>-1</sup> at<br>356 W kg <sup>-1</sup>    | 13.4 Wh kg <sup>-1</sup> at<br>7022 W kg <sup>-1</sup>   | 97.1%, 1000 cycles (0.5 A g <sup>-1</sup> )                                                                   |
| G-LTO//G-SU <sup>16</sup>                           | 0-3.0 V        | 95 Wh kg <sup>-1</sup> at 45<br>W kg <sup>-1</sup>       | 32 Wh kg <sup>-1</sup> at<br>3000 W kg <sup>-1</sup>     | 87%, 500 cycles (15C)                                                                                         |
| VN-RGO//APDC <sup>17</sup>                          | 0-4.0 V        | 162 Wh kg <sup>-1</sup> at<br>200 W kg <sup>-1</sup>     | 64 Wh kg <sup>-1</sup> at 10<br>kW kg <sup>-1</sup>      | 83%, 1000 cycles (2 A g <sup>-1</sup> )                                                                       |
| HDMPC  HDMPC <sup>18</sup>                          | 1.0-4.0 V      | 106.4 Wh kg <sup>-1</sup> at<br>500 W kg <sup>-1</sup>   | 10.2 Wh kg <sup>-1</sup> at<br>88.8 kW kg <sup>-1</sup>  | 88.3%, 8000 cycles (2 A g <sup>-1</sup> )                                                                     |
| NPCM//NPCM-A <sup>19</sup>                          | 2.0-4.0V       | 95.08 Wh kg <sup>-1</sup> at<br>300 W kg <sup>-1</sup>   | 10.2 Wh kg <sup>-1</sup> at<br>15 kW kg <sup>-1</sup>    | 80.1%, 5000 cycles (1500 W kg <sup>-1</sup> )                                                                 |

## Notes and References

- 1 L. Ma, R. Chen, Y. Hu, G. Zhu, T. Chen, H. Lu, J. Liang, Z. Tie, Z. Jin and J. Liu, *Nanoscale*, 2016, **8**, 17911-17918.
- 2 Y. Yang, S. Jin, Z. Zhang, Z. Du, H. Liu, J. Yang, H. Xu and H. Ji, *ACS Applied Materials & Interfaces*, 2017, **9**, 14180-14186.
- 3 F. Sun, J. Gao, X. Liu, L. Wang, Y. Yang, X. Pi, S. Wu and Y. Qin, *Electrochimica Acta*, 2016, **213**, 626-632.
- 4 B. He, G. Li, L. Chen, Z. Chen, M. Jing, M. Zhou, N. Zhou, J. Zeng and Z. Hou, *Electrochimica Acta*, 2018, **278**, 106-113.
- 5 L. Wang, C. Yang, S. Dou, S. Wang, J. Zhang, X. Gao, J. Ma and Y. Yu, *Electrochimica Acta*, 2016, **219**, 592-603.
- 6 F. Zheng, Y. Yang and Q. Chen, *Nature Communications*, 2014, **5**, 5261.
- 7 Y. Cui, H. Wang, X. Xu, Y. Lv, J. Shi, W. Liu, S. Chen and X. Wang, *Sustainable Energy & Fuels*, 2018, **2**, 381-391.
- 8 W. Yu, H. Wang, S. Liu, N. Mao, X. Liu, J. Shi, W. Liu, S. Chen and X. Wang, *Journal of Materials Chemistry A*, 2016, **4**, 5973-5983.
- 9 Q. Xia, H. Yang, M. Wang, M. Yang, Q. Guo, L. Wan, H. Xia and Y. Yu, *Advanced Energy Materials*, 2017, **7**.
- 10 H. Wang, Y. Zhang, H. Ang, Y. Zhang, H. T. Tan, Y. Zhang, Y. Guo, J. B. Franklin, X. L. Wu, M. Srinivasan, H. J. Fan and Q. Yan, *Advanced Functional Materials*, 2016, **26**, 3082-3093.
- 11 Y. Zhao, Y. Cui, J. Shi, W. Liu, Z. Shi, S. Chen, X. Wang and H. Wang, *Journal of Materials Chemistry A*, 2017, **5**, 15243-15252.
- 12 W.-H. Qu, F. Han, A.-H. Lu, C. Xing, M. Qiao and W.-C. Li, *Journal of Materials Chemistry A*, 2014, **2**, 6549.
- 13 F. Zhang, T. Zhang, X. Yang, L. Zhang, K. Leng, Y. Huang and Y. Chen, *Energy & Environmental Science*, 2013, **6**, 1623.
- 14 H. Du, H. Yang, C. Huang, J. He, H. Liu and Y. Li, *Nano Energy*, 2016, **22**, 615-622.
- 15 X. Han, P. Han, J. Yao, S. Zhang, X. Cao, J. Xiong, J. Zhang and G. Cui, *Electrochimica Acta*, 2016, **196**, 603-610.
- 16 K. Leng, F. Zhang, L. Zhang, T. Zhang, Y. Wu, Y. Lu, Y. Huang and Y. Chen, *Nano Research*, 2013, **6**, 581-592.
- 17 R. Wang, J. Lang, P. Zhang, Z. Lin and X. Yan, *Advanced Functional Materials*, 2015, **25**, 2270-2278.
- 18 J. Niu, R. Shao, M. Liu, J. Liang, Z. Zhang, M. Dou, Y. Huang and F. Wang, *Energy Storage Materials*, 2018, **12**, 145-152.
- 19 J. Jiang, P. Nie, B. Ding, Y. Zhang, G. Xu, L. Wu, H. Dou and X. Zhang, *Journal of Materials Chemistry A*, 2017, **5**, 23283-23291.
